# Supplementary material for: Binding motifs of silver in prion octarepeat model peptides: a joint ion mobility, IR and UV spectroscopies, and theoretical approach
Source: Royal Society of Chemistry journal article supplement (doi:10.1039/c2cp40924k), 2012-01-01
Supplement: c2cp40924k.pdf [file c2cp40924k.pdf]

## Binding motifs of silver in Prion octarepeat model peptides: a joint ion mobility, IR and UV spectroscopies, and theoretical approach.

Bruno Bellina, Isabelle Compagnon, Luke MacAleese, Fabien Chirot, Jérôme Lemoine, Philippe Maître, Michel Broyer, Rodolphe Antoine, Alexander Kulesza, Roland Mitrić, Vlasta Bonačić-Koutecký and Philippe Dugourd

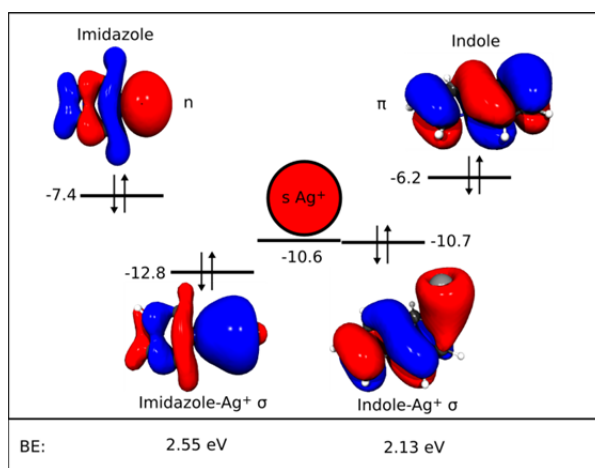

**Scheme S1:** Binding energetics of Imidazole-Ag<sup>+</sup> and Indole-Ag<sup>+</sup> fragments. Top: Kohn-Sham molecular orbital diagram of the involved Indole and Imidazole frontier orbitals, schematic representation of the empty silver s orbital and the resulting binding Imidazole-Ag<sup>+</sup> and Indole-Ag<sup>+</sup> sigma orbitals (energies in eV; n: nitrogen centered nonbonding orbital of imidazole; π: highest π orbital on indole; antibonding orbitals are not shown). Bottom: Binding energy of Ag<sup>+</sup> to Imidazole and Indole.
